# Supplementary material
Source: publisher site journal article supplement (https://www.dovepress.com/get_supplementary_file.php?f=467131.docx)
Supplement: Supplementary file 1 [file get_supplementary_file.php]

| **Table S1 The classification scheme of opioids & BZDs** | | |
| --- | --- | --- |
| **Narcotic analgesics** |  | **Benzodiazepines** |
| CODEINE |  | **Hypnotic agents** |
| MEPERIDINE |  | FLURAZEPAM |
| FENTANYL |  | QUAZEPAM |
| HYDROMORPHONE |  | NITRAZEPAM |
| MORPHINE |  | TEMAZEPAM |
| OXYCODONE |  |  |
| PENTAZOCINE |  | **Anxiolytics** |
| PROPOXYPHENE |  | CHLORDIAZEPOXIDE |
| OPIUM |  | CLORAZEPATE |
| OXYMORPHONE |  | DIAZEPAM |
| BUPRENORPHINE |  | PRAZEPAM |
| HYDROCODONE |  | CLOBAZAM |
| DIHYDROCODEINE |  | CLONAZEPAM |
| MEPERIDINE |  | LORAZEPAM |
| PROPOXYPHENE |  | ALPRAZOLAM |
| PENTAZOCINE |  | OXAZEPAM |
| TRAMADOL |  | BROMAZEPAM |
| PSEUDOEPHEDRINE |  | TRIAZOLAM |
| TAPENTADOL |  | ESTAZOLAM |
|  |  |  |
|  |  | **Z drugs** |
|  |  | ZOLPIDEM |
|  |  | ZALEPLON |
|  |  | ESZOPICLONE |
| Individuals receiving Buprenorphine (d00840) and Methadone (d00050) for opioid dependence or withdrawal treatment are not classified as opioid users. BZD, benzodiazepine. | | |

| **Table S2 Follow-up times & event rates of participants** | | | | | |
| --- | --- | --- | --- | --- | --- |
|  | **Mean ±SE follow-up (years)** | **Median (IQR)**  **follow-up (years)** | **Events** | **Person years** | **Events per 1,000 Person year** |
| **All Participants, excluding deaths within 1year,** n=811 | 9.2 ± 0.2 | 9.6 (7.8,11.2) | 255 | 7269.1 | 35.1 |
| Opioids only, n=179 | 8.6 ± 0.3 | 8.8 (7.2,10.9) | 86 | 1487.9 | 57.8 |
| BZDs only, n=39 | 9.8 ± 0.5 | 10.7 (8.8,11.3) | 15 | 363.2 | 41.3 |
| BZDs plus opioids, n=49 | 8.5 ± 0.5 | 9.2 (7.3,11.2) | 19 | 415.8 | 45.7 |
| Neither, n=544 | 9.4 ± 0.2 | 9.7 (7.9,11.2) | 135 | 5000.0 | 27.0 |

BZD, benzodiazepine; SE, standard error; IQR, interquartile range.

| **Table S3. Mortality associated with opioid monotherapy** | | | | | |
| --- | --- | --- | --- | --- | --- |
| **Characteristic** | **Before PS** |  | **Characteristic** | **After PS** |  |
| ***Adjusted and #weighted HR (95% CI)**  **(n=811)** | ***P* value** | ***Adjusted and #weighted HR (95% CI)**  **(n=648)** | ***P* value** |
| **Opioids only vs. neither** |  |  | **Opioids only vs. neither** |  |  |
| All participants | 1.68 (1.13, 2.49) | 0.01 | All participants | 1.87 (1.25, 2.81) | 0.00 |
| Age, y |  |  | Age, y |  |  |
| 20-60 | 1.09 (0.48, 2.49) | 0.84 | 20-60 | 0.77 (0.24, 2.48) | 0.66 |
| >60 | 2.00 (1.29, 3.09) | 0.00 | >60 | 2.08 (1.36, 3.18) | <0.001 |
| Follow-up time |  |  | Follow-up time |  |  |
| <50th percentile (9.6 y) | 1.86 (1.17, 2.96) | 0.01 | <50th percentile (9.6 y) | 3.03 (1.64, 5.59) | <0.001 |
| ≥50th percentile (9.6 y) | 3.42 (1.86, 6.28) | <0.0001 | ≥50th percentile (9.6 y) | 4.04 (1.18, 13.88) | 0.03 |

Opioid monotherapy with exclusion of participants who died within one year, *Adjusted covariates including age group（20-60, >60 years), sex, race, body mass index group (<30, ≥30), poverty ratio, educational attainment, insurance status, hypertension, hyperlipidemia, coronary heart disease, congestive heart failure, stroke, diabetes, asthma, cancer, and chronic kidney disease. #Survey-weighted. PS, Propensity score; HR Hazard ratio; CI, Confidence interval.

| **Table S4 Mortality associated with opioid or BZD usage** | | | | |
| --- | --- | --- | --- | --- |
| **Characteristic** | **Sample excluding participants who died within 1 year (n=811)** |  | **Sample including participants who died within 1 year (n=833)** |  |
|  | ***Adjusted and weighted**  **HR (95% CI)** | ***P* value** | ***Adjusted and weighted**  **HR (95% CI)** | ***P* value** |
| **Opioids only vs neither** |  |  |  |  |
| All participants | 1.68 (1.13, 2.49) | 0.01 | 1.72 (1.15, 2.56) | 0.01 |
| Age, y |  |  |  |  |
| 20-60 | 1.09 (0.48, 2.49) | 0.84 | 1.83 (0.83, 4.01) | 0.13 |
| >60 | 2.00 (1.29, 3.09) | 0.00 | 2.22 (1.59, 3.11) | <0.0001 |
| Follow-up time |  |  |  |  |
| <50th percentile (9.6 y) | 1.86 (1.17, 2.96) | 0.01 | 2.30 (1.52, 3.49) | <0.0001 |
| ≥50th percentile (9.6 y) | 3.42 (1.86, 6.28) | <0.0001 | 3.57 (1.63, 7.82) | 0.001 |
| **BZDs only vs neither** |  |  |  |  |
| All participants | 1.15 (0.58, 2.27) | 0.69 | 1.28 (0.65, 2.52) | 0.48 |
| Age, y |  |  |  |  |
| 20-60 | 4.29 (1.27, 14.55) | 0.02 | 2.89 (1.14, 7.32) | 0.03 |
| >60 | 0.94 (0.39, 2.26) | 0.90 | 1.39 (0.65, 2.98) | 0.39 |
| Follow-up time |  |  |  |  |
| <50th percentile (9.6 y) | 1.63 (1.05, 2.55) | 0.03 | 2.43 (1.35, 4.40) | 0.00 |
| ≥50th percentile (9.6 y) | 3.39 (0.72, 15.97) | 0.12 | 1.97 (0.34,11.48) | 0.45 |
| **Opioids plus BZDs vs neither** |  |  |  |  |
| All participants | 1.76 (1.11, 2.78) | 0.02 | 1.83 (1.25, 2.68) | 0.00 |
| Age, y |  |  |  |  |
| 20-60 | 1.38 (0.36, 5.29) | 0.64 | 1.75 (0.70, 4.35) | 0.23 |
| >60 | 1.89 (1.20, 2.97) | 0.01 | 3.35 (1.99, 5.64) | <0.0001 |
| Follow-up time |  |  |  |  |
| <50th percentile (9.6 y) | 1.45 (0.82, 2.56) | 0.20 | 2.20 (1.06, 4.57) | 0.04 |
| ≥50th percentile (9.6 y) | 3.19 (0.79, 12.95) | 0.10 | 4.59 (0.87, 24.18) | 0.07 |
| *Adjusted covariates including age group (20-60, >60 years), sex, race, body mass index group (<30, ≥30), poverty ratio, educational attainment, insurance status, hypertension, hyperlipidemia, coronary heart disease, congestive heart failure, stroke, diabetes, asthma, cancer, and chronic kidney disease. BDZ Benzodiazepine | | | | |


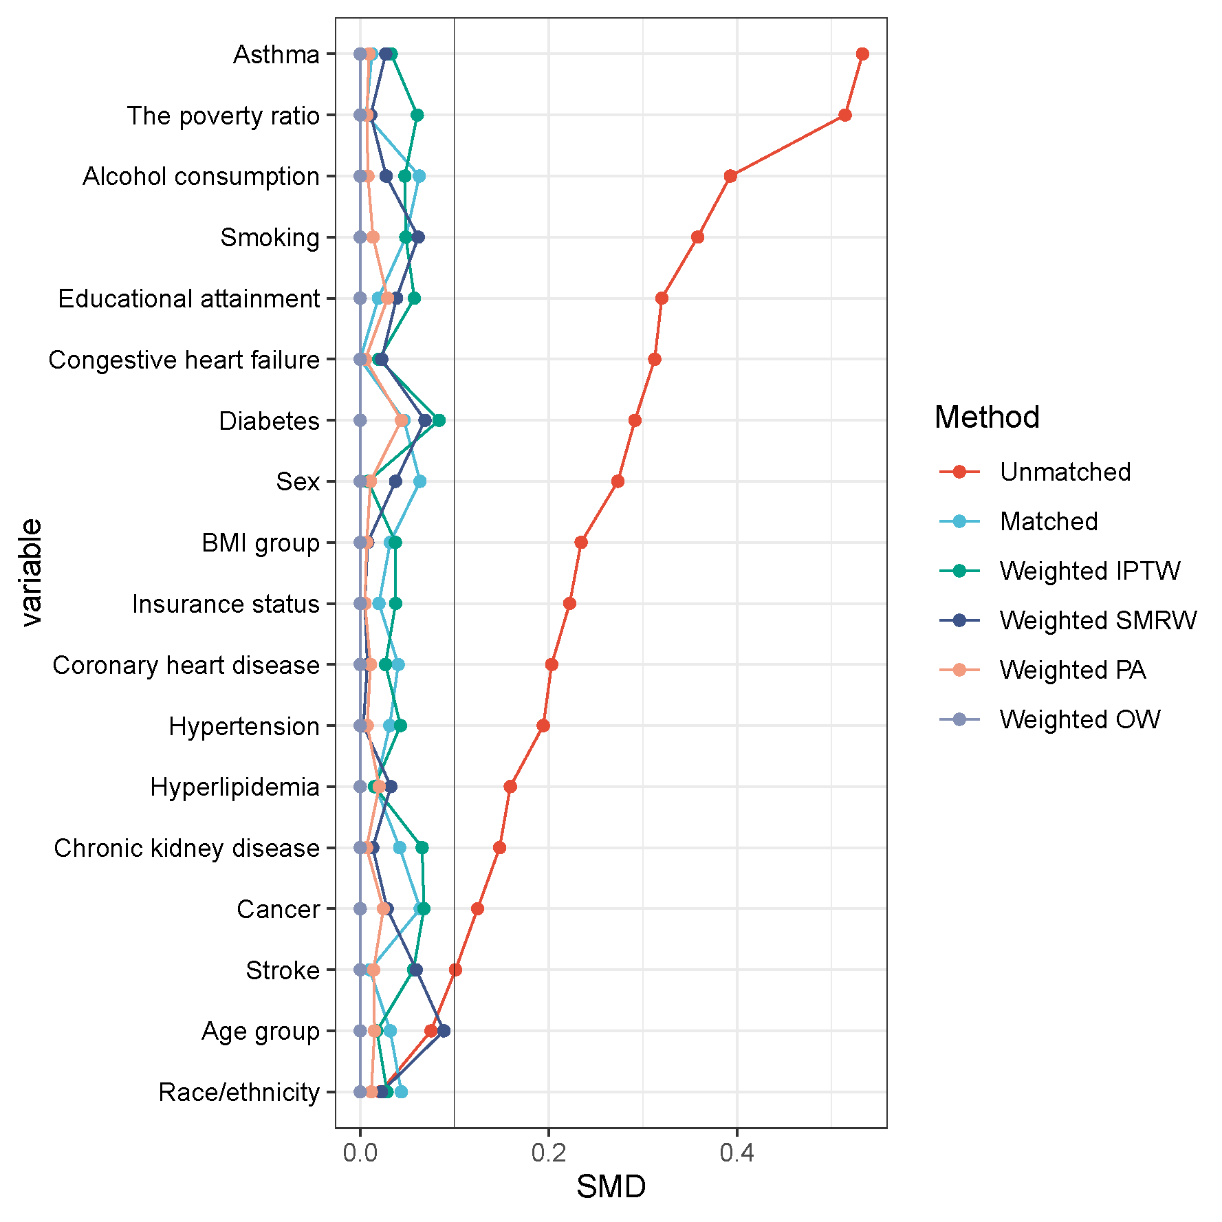


Figure legends:

**Figure S1** **Standardized mean difference**

An absolute standardized difference of less than 0.1 was used to indicate minimal covariate imbalance between the opioid-only group and the group using neither opioids nor benzodiazepines. This assessment was conducted using several methods: propensity score matching (PSM), inverse probability treatment weighting (IPTW), standardized mortality ratio weighting (SMRW), PA weighting (PA), and overlap weighting (OW). SMD, Standardized mean difference.
